# Supplementary material for: Crystal structures and properties of high-nitrogen energetic salts based on (Z)-1,1-diamino-2-nitro-2-(1H-tetrazol-5-yl)ethene
Source: Royal Society of Chemistry journal article supplement (doi:10.1039/d1nj01751a), 2021-01-01
Supplement: d1nj01751a1.pdf [file d1nj01751a1.pdf]

## Electronic Supplementary Information

# Crystal Structures and Properties of High-nitrogen Energetic Salts Based on (*Z*)-1,1-diamino-2-nitro-2-(1*H*-tetrazol-5-yl)ethene

*Zhaoyang Yin,<sup>a</sup> Yaqun Dong,<sup>a</sup> Zhiwei Zeng,<sup>a</sup> Wei Huang<sup>a\*</sup> and Yongxing Tang<sup>a\*</sup>*

[a] Z. Yin, Y. Dong, Z. Zeng, Dr. W. Huang, Prof. Y. Tang

School of Chemical Engineering, Nanjing University of Science and Technology,

Nanjing, 210094 China.

E-mail: [yongxing@njust.edu.cn](mailto:yongxing@njust.edu.cn)

[Huang\\_Wei@njust.edu.cn](mailto:Huang_Wei@njust.edu.cn)

|                                      |     |
|--------------------------------------|-----|
| Crystal Structure Analysis           | S3  |
| NMR Spectra                          | S15 |
| DSC Plots                            | S18 |
| Lattice Energy for Heat of Formation | S20 |

## Crystal Structure Analysis

**Table S1.** Bond lengths [Å] for **2**.

| Atom  | Atom  | Lengths [Å] |
|-------|-------|-------------|
| O(1)  | N(13) | 1.2679(13)  |
| O(2)  | N(13) | 1.2739(14)  |
| O(3)  | N(20) | 1.2648(14)  |
| O(4)  | N(20) | 1.2821(13)  |
| N(1)  | C(1)  | 1.3280(16)  |
| N(2)  | C(1)  | 1.3314(16)  |
| N(3)  | C(1)  | 1.3266(16)  |
| N(4)  | C(2)  | 1.3267(16)  |
| N(5)  | C(2)  | 1.3267(17)  |
| N(6)  | C(2)  | 1.3280(16)  |
| N(7)  | C(3)  | 1.3287(16)  |
| N(8)  | C(3)  | 1.3211(16)  |
| N(9)  | C(5)  | 1.3381(16)  |
| N(9)  | N(10) | 1.3436(16)  |
| N(10) | N(11) | 1.3030(16)  |
| N(11) | N(12) | 1.3392(15)  |
| N(12) | C(5)  | 1.3421(15)  |
| N(13) | C(4)  | 1.3617(15)  |
| N(14) | N(15) | 1.3410(14)  |
| N(14) | C(8)  | 1.3431(15)  |
| N(15) | N(16) | 1.3004(16)  |
| N(16) | N(17) | 1.3445(15)  |
| N(17) | C(8)  | 1.3417(16)  |
| N(18) | C(6)  | 1.3221(16)  |
| N(19) | C(6)  | 1.3259(16)  |
| N(20) | C(7)  | 1.3612(15)  |
| C(3)  | C(4)  | 1.4597(16)  |
| C(4)  | C(5)  | 1.4679(16)  |
| C(6)  | C(7)  | 1.4559(16)  |
| C(7)  | C(8)  | 1.4750(15)  |

**Table S2.** Bond angles [°] for **2**.

| <b>Atom</b> | <b>Atom</b> | <b>Atom</b> | <b>Angle<sup>o</sup></b> |
|-------------|-------------|-------------|--------------------------|
| C(5)        | N(9)        | N(10)       | 104.80(11)               |
| N(11)       | N(10)       | N(9)        | 110.05(11)               |
| N(10)       | N(11)       | N(12)       | 109.15(11)               |
| N(11)       | N(12)       | C(5)        | 105.43(10)               |
| O(1)        | N(13)       | O(2)        | 117.45(10)               |
| O(1)        | N(13)       | C(4)        | 120.57(10)               |
| O(2)        | N(13)       | C(4)        | 121.98(10)               |
| N(15)       | N(14)       | C(8)        | 105.32(10)               |
| N(16)       | N(15)       | N(14)       | 109.16(10)               |
| N(15)       | N(16)       | N(17)       | 110.35(10)               |
| C(8)        | N(17)       | N(16)       | 104.49(10)               |
| O(3)        | N(20)       | O(4)        | 117.56(10)               |
| O(3)        | N(20)       | C(7)        | 120.25(10)               |
| O(4)        | N(20)       | C(7)        | 122.19(10)               |
| N(3)        | C(1)        | N(1)        | 119.45(12)               |
| N(3)        | C(1)        | N(2)        | 120.61(11)               |
| N(1)        | C(1)        | N(2)        | 119.92(12)               |
| N(5)        | C(2)        | N(4)        | 119.77(12)               |
| N(5)        | C(2)        | N(6)        | 120.35(12)               |
| N(4)        | C(2)        | N(6)        | 119.87(12)               |
| N(8)        | C(3)        | N(7)        | 118.15(11)               |
| N(8)        | C(3)        | C(4)        | 121.62(11)               |
| N(7)        | C(3)        | C(4)        | 120.23(11)               |
| N(13)       | C(4)        | C(3)        | 119.99(10)               |
| N(13)       | C(4)        | C(5)        | 118.90(10)               |
| C(3)        | C(4)        | C(5)        | 121.05(10)               |
| N(9)        | C(5)        | N(12)       | 110.56(11)               |
| N(9)        | C(5)        | C(4)        | 126.82(11)               |
| N(12)       | C(5)        | C(4)        | 122.58(11)               |
| N(18)       | C(6)        | N(19)       | 118.71(11)               |
| N(18)       | C(6)        | C(7)        | 119.21(11)               |
| N(19)       | C(6)        | C(7)        | 122.07(11)               |
| N(20)       | C(7)        | C(6)        | 120.03(10)               |
| N(20)       | C(7)        | C(8)        | 118.80(10)               |
| C(6)        | C(7)        | C(8)        | 121.17(10)               |
| N(17)       | C(8)        | N(14)       | 110.67(10)               |
| N(17)       | C(8)        | C(7)        | 127.36(11)               |
| N(14)       | C(8)        | C(7)        | 121.93(10)               |

**Table S3.** Torsion angles [°] for **2**.

| <b>Atom</b> | <b>Atom</b> | <b>Atom</b> | <b>Atom</b> | <b>Angle/°</b> |
|-------------|-------------|-------------|-------------|----------------|
| C(5)        | N(9)        | N(10)       | N(11)       | -0.80(15)      |
| N(9)        | N(10)       | N(11)       | N(12)       | 0.70(16)       |
| N(10)       | N(11)       | N(12)       | C(5)        | -0.30(15)      |
| C(8)        | N(14)       | N(15)       | N(16)       | -0.59(14)      |
| N(14)       | N(15)       | N(16)       | N(17)       | 0.58(14)       |
| N(15)       | N(16)       | N(17)       | C(8)        | -0.31(14)      |
| O(1)        | N(13)       | C(4)        | C(3)        | -179.18(10)    |
| O(2)        | N(13)       | C(4)        | C(3)        | 1.57(17)       |
| O(1)        | N(13)       | C(4)        | C(5)        | 3.59(16)       |
| O(2)        | N(13)       | C(4)        | C(5)        | -175.66(10)    |
| N(8)        | C(3)        | C(4)        | N(13)       | -0.35(17)      |
| N(7)        | C(3)        | C(4)        | N(13)       | -179.28(10)    |
| N(8)        | C(3)        | C(4)        | C(5)        | 176.82(11)     |
| N(7)        | C(3)        | C(4)        | C(5)        | -2.11(17)      |
| N(10)       | N(9)        | C(5)        | N(12)       | 0.61(15)       |
| N(10)       | N(9)        | C(5)        | C(4)        | 178.41(11)     |
| N(11)       | N(12)       | C(5)        | N(9)        | -0.21(15)      |
| N(11)       | N(12)       | C(5)        | C(4)        | -178.12(11)    |
| N(13)       | C(4)        | C(5)        | N(9)        | 19.10(18)      |
| C(3)        | C(4)        | C(5)        | N(9)        | -158.10(12)    |
| N(13)       | C(4)        | C(5)        | N(12)       | -163.34(11)    |
| C(3)        | C(4)        | C(5)        | N(12)       | 19.46(17)      |
| O(3)        | N(20)       | C(7)        | C(6)        | -176.40(10)    |
| O(4)        | N(20)       | C(7)        | C(6)        | 3.79(17)       |
| O(3)        | N(20)       | C(7)        | C(8)        | 3.95(16)       |
| O(4)        | N(20)       | C(7)        | C(8)        | -175.86(10)    |
| N(18)       | C(6)        | C(7)        | N(20)       | 178.84(11)     |
| N(19)       | C(6)        | C(7)        | N(20)       | -1.66(18)      |
| N(18)       | C(6)        | C(7)        | C(8)        | -1.52(17)      |
| N(19)       | C(6)        | C(7)        | C(8)        | 177.98(11)     |
| N(16)       | N(17)       | C(8)        | N(14)       | -0.07(14)      |
| N(16)       | N(17)       | C(8)        | C(7)        | 177.64(11)     |
| N(15)       | N(14)       | C(8)        | N(17)       | 0.41(14)       |
| N(15)       | N(14)       | C(8)        | C(7)        | -177.45(10)    |
| N(20)       | C(7)        | C(8)        | N(17)       | 15.07(18)      |
| C(6)        | C(7)        | C(8)        | N(17)       | -164.58(12)    |
| N(20)       | C(7)        | C(8)        | N(14)       | -167.45(11)    |
| C(6)        | C(7)        | C(8)        | N(14)       | 12.90(17)      |

**Table S4.** Hydrogen bonds for **2** [Å and °].

| D     | H      | A                  | d(D-H)/Å  | d(H-A)/Å  | d(D-A)/Å   | D-H-A/°   |
|-------|--------|--------------------|-----------|-----------|------------|-----------|
| N(1)  | H(1A)  | O(3)               | 0.87(2)   | 2.03(2)   | 2.8854(15) | 167.5(18) |
| N(1)  | H(1B)  | N(9) <sup>1</sup>  | 0.85(2)   | 2.55(2)   | 3.2389(16) | 138.6(16) |
| N(1)  | H(1B)  | N(10) <sup>1</sup> | 0.85(2)   | 2.33(2)   | 3.0994(16) | 150.6(17) |
| N(2)  | H(2B)  | O(1) <sup>1</sup>  | 0.880(19) | 2.428(18) | 3.1031(15) | 133.8(15) |
| N(2)  | H(2B)  | N(9) <sup>1</sup>  | 0.880(19) | 2.197(19) | 3.0158(16) | 154.5(16) |
| N(2)  | H(2A)  | N(16) <sup>2</sup> | 0.897(18) | 2.186(18) | 3.0525(16) | 162.3(15) |
| N(3)  | H(3B)  | N(15) <sup>2</sup> | 0.822(19) | 2.292(19) | 3.0892(16) | 163.5(16) |
| N(3)  | H(3A)  | O(4)               | 0.812(18) | 2.119(19) | 2.9164(15) | 167.5(15) |
| N(4)  | H(4A)  | O(2)               | 0.82(2)   | 2.02(2)   | 2.8334(15) | 173.7(18) |
| N(4)  | H(4B)  | N(10) <sup>3</sup> | 0.81(2)   | 2.69(2)   | 3.3621(17) | 141.3(17) |
| N(4)  | H(4B)  | N(11) <sup>3</sup> | 0.81(2)   | 2.25(2)   | 3.0355(17) | 164.5(17) |
| N(5)  | H(5A)  | O(1) <sup>4</sup>  | 0.89(2)   | 2.25(2)   | 2.9672(14) | 137.9(15) |
| N(5)  | H(5B)  | O(1)               | 0.900(19) | 2.06(2)   | 2.9573(15) | 171.1(17) |
| N(5)  | H(5B)  | O(2)               | 0.900(19) | 2.650(19) | 3.3399(15) | 134.1(15) |
| N(6)  | H(6A)  | N(10) <sup>3</sup> | 0.86(2)   | 2.12(2)   | 2.9703(17) | 169.7(16) |
| N(6)  | H(6B)  | O(3) <sup>5</sup>  | 0.84(2)   | 2.49(2)   | 3.0459(15) | 124.1(17) |
| N(6)  | H(6B)  | N(9) <sup>4</sup>  | 0.84(2)   | 2.56(2)   | 3.2199(17) | 136.5(18) |
| N(7)  | H(7A)  | O(3)               | 0.904(19) | 2.458(18) | 3.0951(14) | 127.8(14) |
| N(7)  | H(7A)  | N(17)              | 0.904(19) | 2.173(19) | 3.0318(16) | 158.2(16) |
| N(7)  | H(7B)  | N(12)              | 0.874(18) | 1.978(18) | 2.6921(16) | 138.1(15) |
| N(8)  | H(8A)  | O(2)               | 0.924(18) | 1.804(18) | 2.5266(15) | 133.0(16) |
| N(8)  | H(8B)  | N(16)              | 0.92(2)   | 2.18(2)   | 3.0064(16) | 149.4(16) |
| N(8)  | H(8B)  | N(17)              | 0.92(2)   | 2.44(2)   | 3.1748(16) | 137.8(16) |
| N(18) | H(18A) | N(14)              | 0.89(2)   | 1.91(2)   | 2.6312(15) | 136.9(17) |
| N(18) | H(18B) | N(15) <sup>6</sup> | 0.859(19) | 2.408(18) | 3.0371(15) | 130.5(15) |
| N(19) | H(19A) | N(11) <sup>7</sup> | 0.87(2)   | 2.37(2)   | 3.0210(16) | 131.5(17) |
| N(19) | H(19B) | O(4)               | 0.93(2)   | 1.81(2)   | 2.5412(16) | 134.1(18) |

<sup>1</sup>2-X,-Y,-Z; <sup>2</sup>+X,+Y,-1+Z; <sup>3</sup>+X,+Y,1+Z; <sup>4</sup>3-X,-Y,1-Z; <sup>5</sup>2-X,-Y,1-Z; <sup>6</sup>-X,1-Y,1-Z;

<sup>7</sup>1-X,1-Y,-Z

**Table S5.** Bond lengths [ $\text{\AA}$ ] for **3**.

| Atom | Atom | Lengths [ $\text{\AA}$ ] |
|------|------|--------------------------|
| O1   | N7   | 1.294(4)                 |
| O2   | N7   | 1.267(4)                 |
| N1   | N2   | 1.343(4)                 |
| N1   | C4   | 1.344(4)                 |
| N2   | N3   | 1.313(5)                 |
| N3   | N4   | 1.350(4)                 |
| N4   | C4   | 1.334(5)                 |
| N5   | C2   | 1.313(5)                 |
| N6   | C2   | 1.329(5)                 |
| N7   | C3   | 1.350(4)                 |
| N8   | C1   | 1.320(5)                 |
| N9   | C1   | 1.315(5)                 |
| N10  | C1   | 1.340(5)                 |
| N10  | N11  | 1.409(5)                 |
| C2   | C3   | 1.460(5)                 |
| C3   | C4   | 1.472(5)                 |

**Table S6.** Bond angles [°] for **3**.

| <b>Atom</b> | <b>Atom</b> | <b>Atom</b> | <b>Angle/°</b> |
|-------------|-------------|-------------|----------------|
| N2          | N1          | C4          | 104.9(3)       |
| N3          | N2          | N1          | 109.2(3)       |
| N2          | N3          | N4          | 109.9(3)       |
| C4          | N4          | N3          | 104.5(3)       |
| O2          | N7          | O1          | 117.8(3)       |
| O2          | N7          | C3          | 120.9(3)       |
| O1          | N7          | C3          | 121.2(3)       |
| C1          | N10         | N11         | 118.4(4)       |
| N9          | C1          | N8          | 120.5(4)       |
| N9          | C1          | N10         | 120.0(4)       |
| N8          | C1          | N10         | 119.5(4)       |
| N5          | C2          | N6          | 119.0(3)       |
| N5          | C2          | C3          | 123.0(4)       |
| N6          | C2          | C3          | 117.9(3)       |
| N7          | C3          | C2          | 121.5(3)       |
| N7          | C3          | C4          | 119.1(3)       |
| C2          | C3          | C4          | 119.0(3)       |
| N4          | C4          | N1          | 111.5(3)       |
| N4          | C4          | C3          | 127.3(3)       |
| N1          | C4          | C3          | 121.2(3)       |



**Table S7.** Torsion angles [°] for **3**.

| <b>Atom</b> | <b>Atom</b> | <b>Atom</b> | <b>Atom</b> | <b>Angle/°</b> |
|-------------|-------------|-------------|-------------|----------------|
| C4          | N1          | N2          | N3          | -0.2(4)        |
| N1          | N2          | N3          | N4          | 0.4(4)         |
| N2          | N3          | N4          | C4          | -0.4(4)        |
| N11         | N10         | C1          | N9          | 5.1(6)         |
| N11         | N10         | C1          | N8          | -175.8(4)      |
| O2          | N7          | C3          | C2          | 178.2(4)       |
| O1          | N7          | C3          | C2          | -1.5(5)        |
| O2          | N7          | C3          | C4          | -9.3(5)        |
| O1          | N7          | C3          | C4          | 171.0(3)       |
| N5          | C2          | C3          | N7          | 16.5(5)        |
| N6          | C2          | C3          | N7          | -164.3(3)      |
| N5          | C2          | C3          | C4          | -156.0(3)      |
| N6          | C2          | C3          | C4          | 23.3(5)        |
| N3          | N4          | C4          | N1          | 0.3(4)         |
| N3          | N4          | C4          | C3          | -179.1(3)      |
| N2          | N1          | C4          | N4          | 0.0(4)         |
| N2          | N1          | C4          | C3          | 179.3(3)       |
| N7          | C3          | C4          | N4          | 52.2(5)        |
| C2          | C3          | C4          | N4          | -135.1(4)      |
| N7          | C3          | C4          | N1          | -127.1(4)      |
| C2          | C3          | C4          | N1          | 45.6(5)        |

**Table S8.** Hydrogen bonds for **3** [Å and °].

| D   | H    | A               | d(D-H)/Å | d(H-A)/Å | d(D-A)/Å | D-H-A/° |
|-----|------|-----------------|----------|----------|----------|---------|
| N5  | H5A  | N3 <sup>1</sup> | 0.86     | 2.56     | 3.277(5) | 140.9   |
| N5  | H5A  | N4 <sup>1</sup> | 0.86     | 2.06     | 2.879(5) | 158.5   |
| N5  | H5B  | O1              | 0.86     | 2.03     | 2.621(5) | 125.5   |
| N6  | H6A  | O2 <sup>1</sup> | 0.86     | 2.25     | 3.020(5) | 148.6   |
| N6  | H6A  | N4 <sup>1</sup> | 0.86     | 2.69     | 3.362(5) | 135.5   |
| N6  | H6B  | N1 <sup>2</sup> | 0.86     | 2.30     | 3.010(5) | 140.2   |
| N8  | H8A  | O1              | 0.86     | 2.03     | 2.889(4) | 176.3   |
| N8  | H8B  | N2 <sup>3</sup> | 0.86     | 2.32     | 2.983(5) | 133.9   |
| N9  | H9A  | O2              | 0.86     | 2.11     | 2.967(5) | 171.1   |
| N9  | H9B  | N1 <sup>4</sup> | 0.86     | 2.48     | 3.142(5) | 134.2   |
| N10 | H10  | N3 <sup>5</sup> | 0.86     | 2.15     | 2.933(5) | 150.3   |
| N11 | H11B | O1 <sup>6</sup> | 0.83(5)  | 2.50(5)  | 3.230(6) | 147(5)  |

<sup>1</sup>-X,1/2+Y,1-Z; <sup>2</sup>-1+X,+Y,+Z; <sup>3</sup>+X,+Y,1+Z; <sup>4</sup>1-X,-1/2+Y,1-Z; <sup>5</sup>1+X,+Y,1+Z;

<sup>6</sup>1-X,-1/2+Y,2-Z

**Table S9.** Bond lengths [ $\text{\AA}$ ] for **5**.

| <b>Atom</b> | <b>Atom</b> | <b>Lengths [<math>\text{\AA}</math>]</b> |
|-------------|-------------|------------------------------------------|
| O(1)        | N(15)       | 1.2708(15)                               |
| O(2)        | N(15)       | 1.2658(15)                               |
| N(2)        | C(4)        | 1.3238(18)                               |
| N(2)        | N(3)        | 1.4139(17)                               |
| N(4)        | C(4)        | 1.3253(16)                               |
| N(4)        | N(5)        | 1.4104(16)                               |
| N(6)        | C(4)        | 1.3284(18)                               |
| N(6)        | N(7)        | 1.4135(15)                               |
| N(9)        | C(3)        | 1.3149(16)                               |
| N(10)       | C(3)        | 1.3253(16)                               |
| N(11)       | C(1)        | 1.3353(17)                               |
| N(11)       | N(12)       | 1.3385(16)                               |
| N(12)       | N(13)       | 1.3107(17)                               |
| N(13)       | N(14)       | 1.3381(17)                               |
| N(14)       | C(1)        | 1.3363(17)                               |
| N(15)       | C(2)        | 1.3513(17)                               |
| C(1)        | C(2)        | 1.4711(17)                               |
| C(2)        | C(3)        | 1.4475(17)                               |

**Table S10.** Bond angles [°] for **5**.

| <b>Atom</b> | <b>Atom</b> | <b>Atom</b> | <b>Angle<sup>o</sup></b> |
|-------------|-------------|-------------|--------------------------|
| C(4)        | N(2)        | N(3)        | 118.94(11)               |
| C(4)        | N(4)        | N(5)        | 118.81(11)               |
| C(4)        | N(4)        | N(5)        | 118.21(11)               |
| C(1)        | N(11)       | N(12)       | 104.88(11)               |
| N(13)       | N(12)       | N(11)       | 109.44(10)               |
| N(12)       | N(13)       | N(14)       | 109.62(10)               |
| C(1)        | N(14)       | N(13)       | 104.76(11)               |
| O(2)        | N(15)       | O(1)        | 118.16(11)               |
| O(2)        | N(15)       | C(2)        | 122.63(11)               |
| O(1)        | N(15)       | C(2)        | 119.21(12)               |
| N(11)       | C(1)        | N(14)       | 111.29(11)               |
| N(11)       | C(1)        | C(2)        | 122.24(11)               |
| N(14)       | C(1)        | C(2)        | 126.43(12)               |
| N(15)       | C(2)        | C(3)        | 120.61(11)               |
| N(15)       | C(2)        | C(1)        | 118.41(11)               |
| C(3)        | C(2)        | C(1)        | 120.93(10)               |
| N(9)        | C(3)        | N(10)       | 118.90(11)               |
| N(9)        | C(3)        | C(2)        | 121.97(11)               |
| N(10)       | C(3)        | C(2)        | 119.11(11)               |
| N(2)        | C(4)        | N(4)        | 120.35(12)               |
| N(2)        | C(4)        | N(6)        | 119.90(11)               |
| N(4)        | C(4)        | N(6)        | 119.74(11)               |

**Table S11.** Torsion angles [°] for **5**.

| <b>Atom</b> | <b>Atom</b> | <b>Atom</b> | <b>Atom</b> | <b>Angle</b> <sup>°</sup> |
|-------------|-------------|-------------|-------------|---------------------------|
| C(1)        | N(11)       | N(12)       | N(13)       | -0.27(13)                 |
| N(11)       | N(12)       | N(13)       | N(14)       | 0.38(13)                  |
| N(12)       | N(13)       | N(14)       | C(1)        | -0.33(13)                 |
| N(12)       | N(11)       | C(1)        | N(14)       | 0.06(14)                  |
| N(12)       | N(11)       | C(1)        | C(2)        | -178.07(10)               |
| N(13)       | N(14)       | C(1)        | N(11)       | 0.16(14)                  |
| N(13)       | N(14)       | C(1)        | C(2)        | 178.19(11)                |
| O(2)        | N(15)       | C(2)        | C(3)        | 2.86(19)                  |
| O(1)        | N(15)       | C(2)        | C(3)        | -177.75(13)               |
| O(2)        | N(15)       | C(2)        | C(1)        | -179.82(11)               |
| O(1)        | N(15)       | C(2)        | C(1)        | -0.43(19)                 |
| N(11)       | C(1)        | C(2)        | N(15)       | -131.56(13)               |
| N(14)       | C(1)        | C(2)        | N(15)       | 50.62(17)                 |
| N(11)       | C(1)        | C(2)        | C(3)        | 45.76(16)                 |
| N(14)       | C(1)        | C(2)        | C(3)        | -132.07(13)               |
| N(15)       | C(2)        | C(3)        | N(9)        | 17.81(18)                 |
| C(1)        | C(2)        | C(3)        | N(9)        | 159.44(12)                |
| N(15)       | C(2)        | C(3)        | N(10)       | -163.71(13)               |
| C(1)        | C(2)        | C(3)        | N(10)       | 19.03(17)                 |
| N(3)        | N(2)        | C(4)        | N(4)        | 6.46(18)                  |
| N(3)        | N(2)        | C(4)        | N(6)        | -174.59(11)               |
| N(5)        | N(4)        | C(4)        | N(2)        | -179.91(11)               |
| N(5)        | N(4)        | C(4)        | N(6)        | 1.13(18)                  |
| N(7)        | N(6)        | C(4)        | N(2)        | -9.37(18)                 |
| N(7)        | N(6)        | C(4)        | N(4)        | 169.60(12)                |

**Table S12.** Hydrogen bonds for **5** [Å and °].

| D   | H    | A                 | d(D-H)/Å | d(H-A)/Å | d(D-A)/Å | D-H-A/° |
|-----|------|-------------------|----------|----------|----------|---------|
| N2  | H2   | N11 <sup>1</sup>  | 0.837    | 2.202    | 2.930    | 145.47  |
| N4  | H4   | N12 <sub>2</sub>  | 0.863    | 2.451    | 3.079    | 130.06  |
| N6  | H6   | N3 <sup>3</sup>   | 0.877    | 2.343    | 3.213    | 171.44  |
| N9  | H9A  | O1 <sup>4</sup>   | 0.860    | 1.950    | 2.800    | 169.46  |
| N9  | H9B  | O1 <sup>5</sup>   | 0.860    | 2.627    | 3.273    | 132.85  |
| N9  | H9B  | O2                | 0.860    | 2.020    | 2.607    | 124.71  |
| N10 | H10A | N14 <sup>6</sup>  | 0.860    | 2.350    | 3.156    | 156.01  |
| N10 | H10B | N11               | 0.860    | 2.592    | 3.040    | 113.55  |
| N10 | H10B | N13 <sup>7</sup>  | 0.860    | 2.234    | 3.062    | 161.59  |
| N3  | H3B  | O2 <sup>8</sup>   | 0.927    | 2.367    | 3.146    | 141.57  |
| N3  | H3B  | N5 <sup>9</sup>   | 0.927    | 2.480    | 3.049    | 119.84  |
| N5  | H5A  | N14 <sup>10</sup> | 0.896    | 2.359    | 3.194    | 155.16  |
| N5  | H5B  | N7 <sup>11</sup>  | 0.929    | 2.524    | 3.154    | 125.36  |
| N5  | H5B  | N11 <sup>12</sup> | 0.929    | 2.462    | 3.202    | 136.67  |
| N7  | H7A  | N12 <sup>13</sup> | 0.922    | 2.259    | 3.143    | 160.67  |
| N7  | H7B  | O2                | 0.886    | 2.189    | 2.897    | 136.54  |

<sup>1</sup>-x+1, -y+1, -z+1; <sup>2</sup>-x, -y+1, -z+1; <sup>3</sup>-x, y+1/2, -z+3/2; <sup>4</sup>x+1, y, z; <sup>5</sup>-x+1, -y+1, -z+1;  
<sup>6</sup>x+1, y, z; <sup>7</sup>-x+1, -y+2, -z+1; <sup>8</sup>-x+1, y-1/2, -z+3/2; <sup>9</sup>-x, y-1/2, -z+3/2; <sup>10</sup>-x, y-1/2, -z+3/2;  
<sup>11</sup>x-1, y, z; <sup>12</sup>-x, -y+1, -z+1; <sup>13</sup>-x, -y+1, -z+1

## NMR Spectra

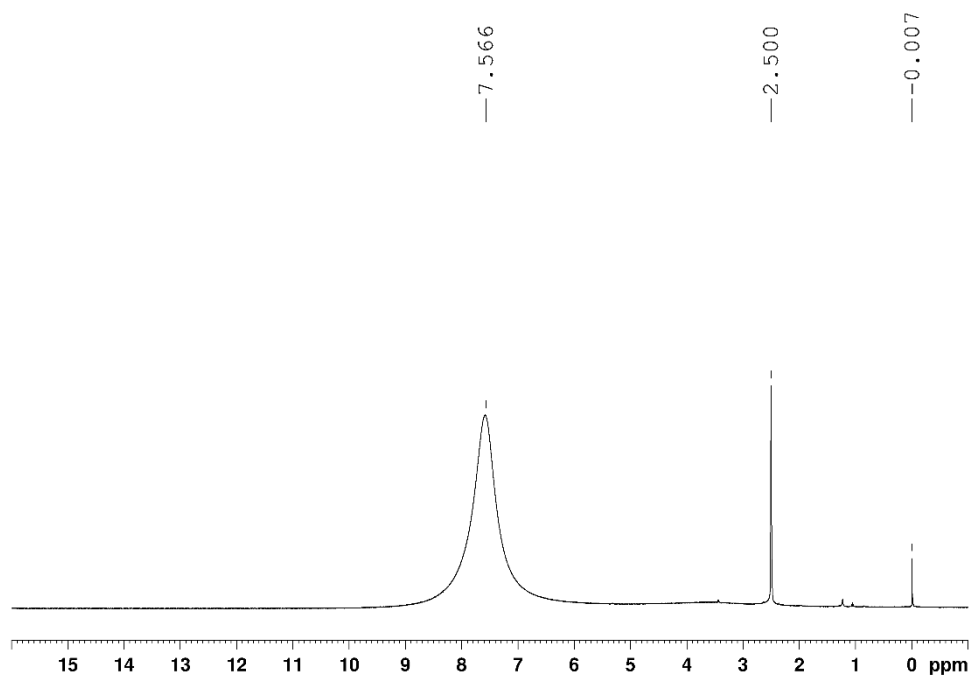

Figure S1.  $^1\text{H}$  NMR spectrum of **2**.

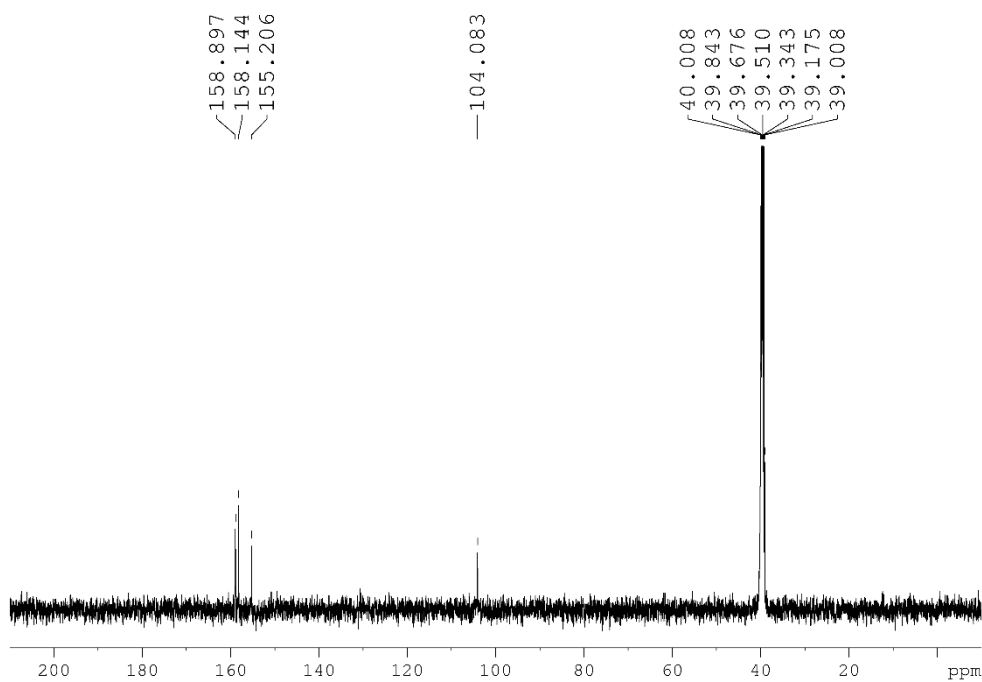

Figure S2.  $^{13}\text{C}$  NMR spectrum of **2**.

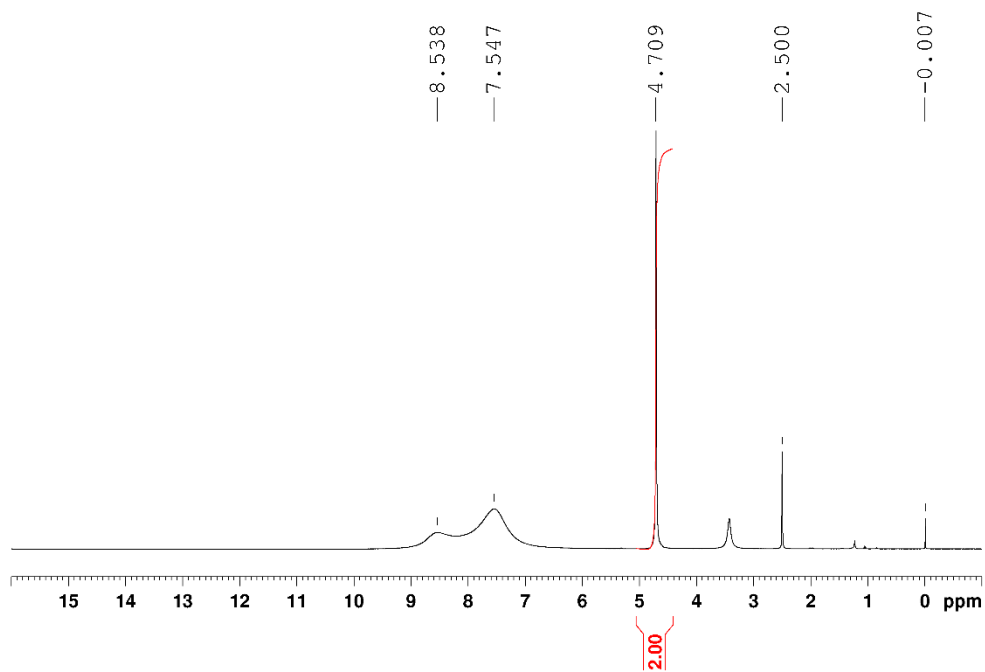

Figure S3.  $^1\text{H}$  NMR spectrum of **3**.

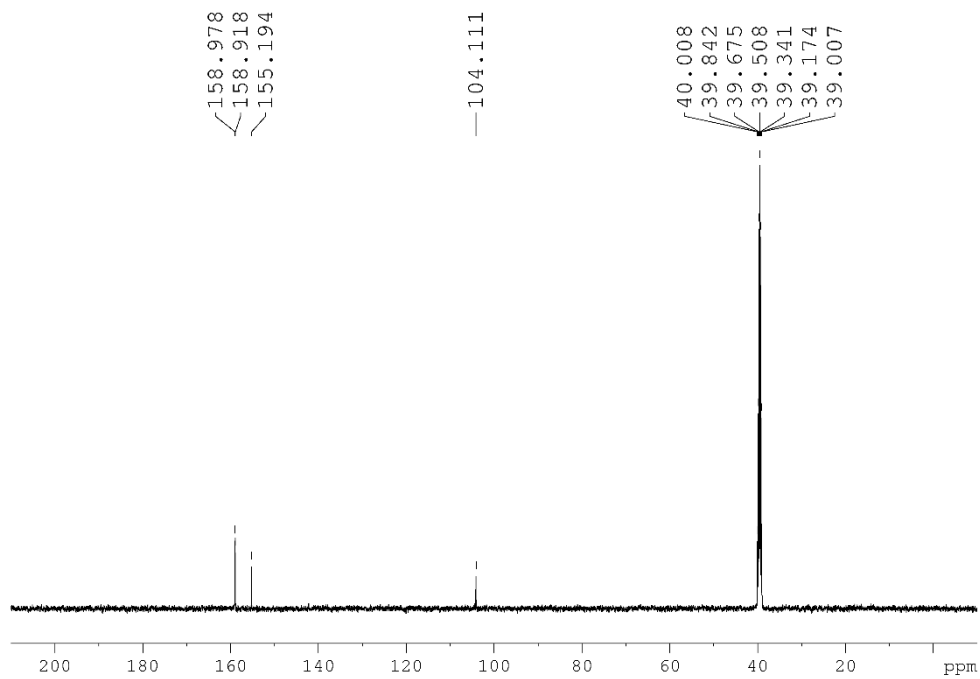

Figure S4.  $^{13}\text{C}$  NMR spectrum of **3**.



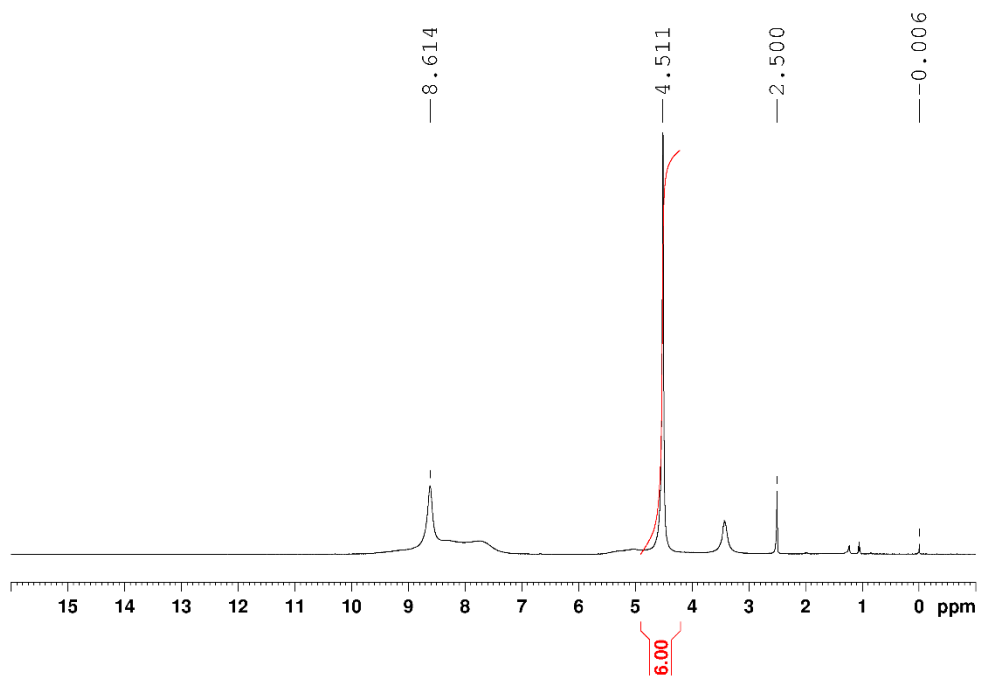

Figure S5.  $^1\text{H}$  NMR spectrum of **5**.

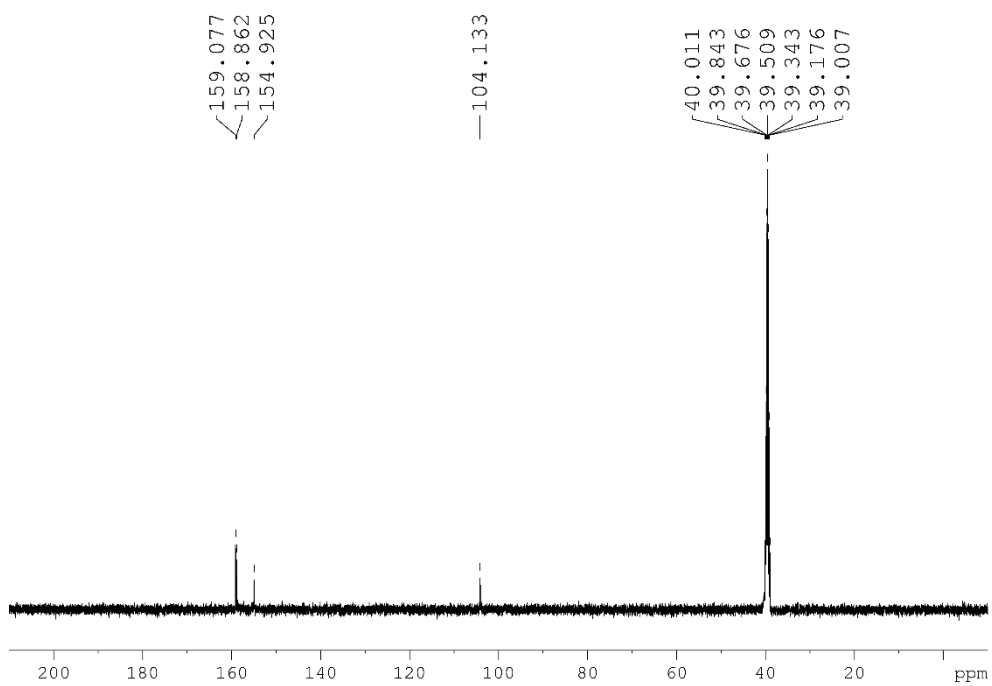

Figure S6.  $^{13}\text{C}$  NMR spectrum of **5**.

## DSC Plot

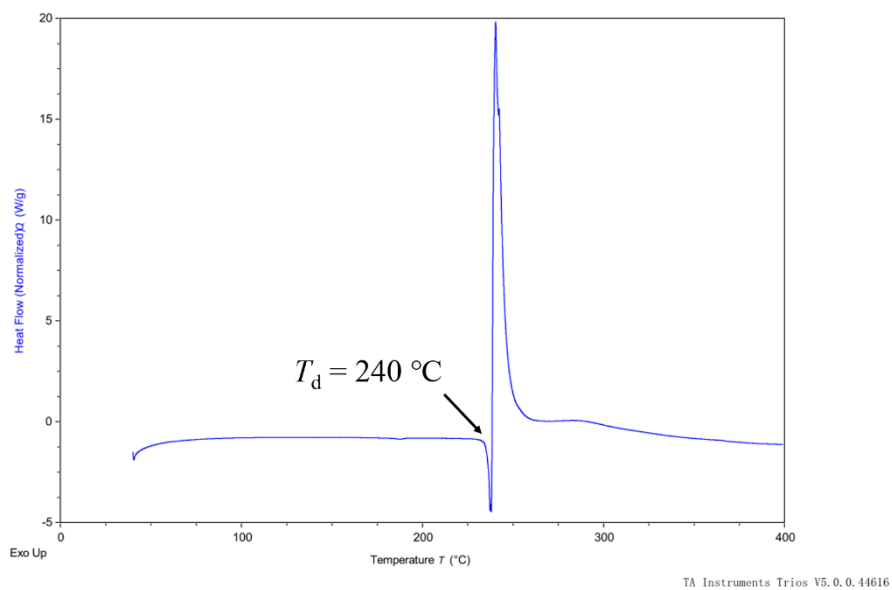

**Figure S7.** DSC plot of **2**.

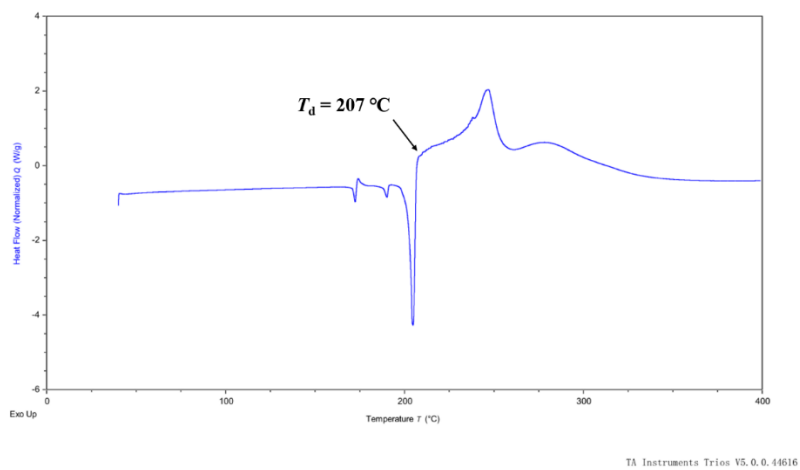

**Figure S8.** DSC plot of **3**.

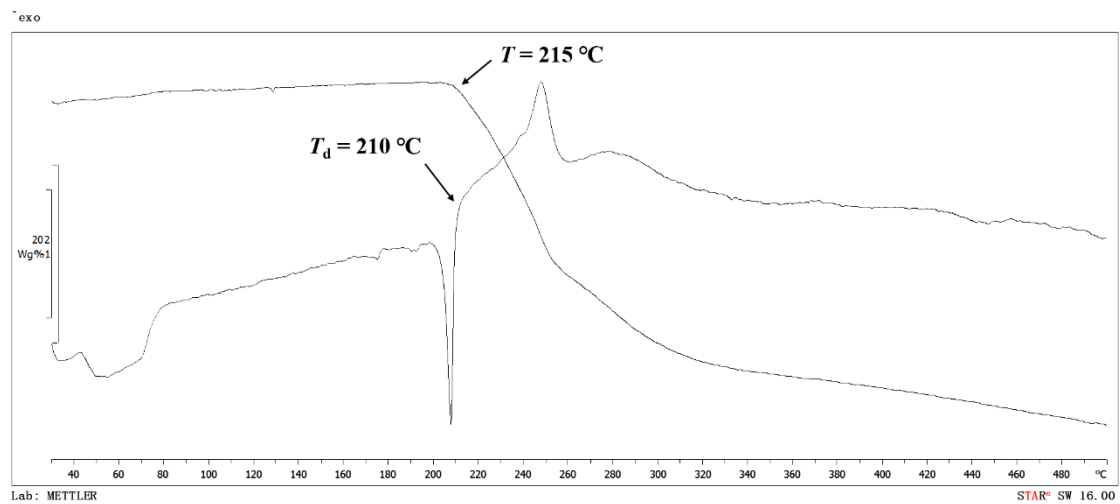

Figure S9. TG-DSC plot of 3.

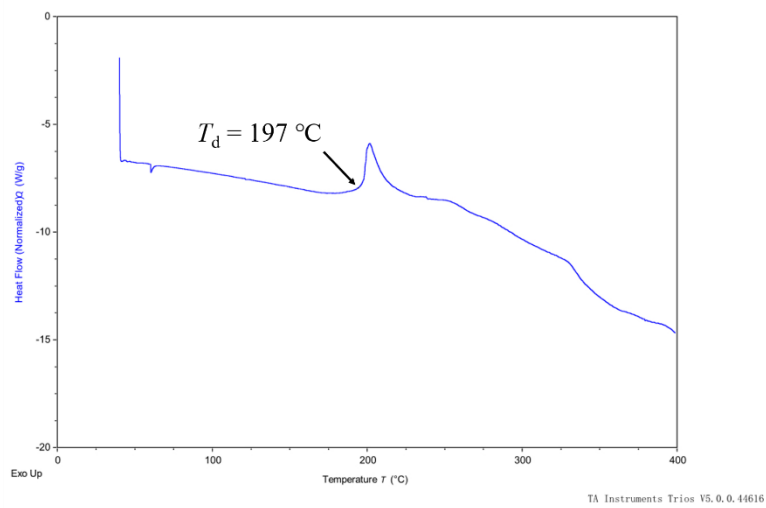

Figure S10. DSC plot of 5.

**Table S13.** Lattice Energy for Heat of Formation.

| Compounds | $\Delta H_L$<br>(kJ/mol) | $\Delta H_f^{\text{Cation}}$<br>(kJ/mol) | $\Delta H_f^{\text{anion}}$<br>(kJ/mol) | $\Delta H_f^{298}$<br>(kJ/mol) |
|-----------|--------------------------|------------------------------------------|-----------------------------------------|--------------------------------|
| G-TzFOX   | 492.29                   | 575.85                                   | 147.14                                  | 230.70                         |
| AG-TzFOX  | 482.79                   | 667.41                                   | 147.14                                  | 331.75                         |
| TAG-TzFOX | 466.47                   | 871.47                                   | 147.14                                  | 552.15                         |
